# Supplementary material
Source: PubMed Central journal article supplement (PMC5309369)
Supplement: TJP-595-1253-s001.pdf [file TJP-595-1253-s001.pdf]

TITLE:

Molecular recognition at the neuromuscular synapse

RUNNING TITLE:

ACh vs. choline affinity

AUTHORS:

Iva Bruhova and Anthony Auerbach

Department of Physiology and Biophysics, SUNY at Buffalo, Buffalo, NY, 14214, USA

CORRESPONDING AUTHOR:

Anthony Auerbach, Department of Physiology and Biophysics,

SUNY at Buffalo, Buffalo, NY 14214

Phone: 716-829-2435; Fax: 716-829-2569

Email: [auerbach@buffalo.edu](mailto:auerbach@buffalo.edu)

SUPPLEMENTARY INFORMATION

**Table S1: Energy estimates for aromatic mutants**

| <b>Construct</b>                | <b>Ligand</b>                    | <b><math>E_2 \pm \text{SEM}</math></b> | <b><math>E_0^a \pm \text{SEM}</math></b> | <b><math>G_B \pm \text{SEM},</math><br/><b>kcal/mol</b></b> | <b><math>\Delta G_B,</math><br/><b>kcal/mol</b></b> |
|---------------------------------|----------------------------------|----------------------------------------|------------------------------------------|-------------------------------------------------------------|-----------------------------------------------------|
| <b>WT</b>                       | ACh                              | 25.4 <sup>b</sup>                      | 7.4E-7                                   | -5.1                                                        |                                                     |
|                                 | TMA                              | 2.54 <sup>b</sup>                      | 7.4E-7                                   | -4.5                                                        |                                                     |
|                                 | Cho                              | 0.046 <sup>b</sup>                     | 7.4E-7                                   | -3.3                                                        |                                                     |
|                                 | 4OHB <sup>c</sup>                | 0.71                                   | 7.4E-7                                   | -4.1                                                        |                                                     |
|                                 | PTMA <sup>c</sup>                | 0.29                                   | 7.4E-7                                   | -3.8                                                        |                                                     |
|                                 | 3OHP <sup>c</sup>                | 0.15                                   | 7.4E-7                                   | -3.6                                                        |                                                     |
| <b><math>\alpha</math>W149F</b> | ACh                              | 1.13 <sup>b</sup> ±0.10                | 2.3E-6±3.E-7                             | -3.9±0.04                                                   | 1.3                                                 |
|                                 | TMA                              | 0.75±0.06                              | 2.3E-6±3.E-7                             | -3.8±0.04                                                   | 0.7                                                 |
|                                 | Cho                              | 0.04±0.004                             | 2.3E-6±3.E-7                             | -2.9±0.04                                                   | 0.4                                                 |
| <b><math>\alpha</math>W149A</b> | ACh                              | 0.07 <sup>b</sup> ±0.003               | 5.5E-6±3.E-8                             | -2.8±0.01                                                   | 2.4                                                 |
|                                 | TMA                              | 0.004±0.001                            | 5.5E-6±3.E-8                             | -1.9±0.06                                                   | 2.5                                                 |
|                                 | Cho                              | 0.003±0.001                            | 5.5E-6±3.E-8                             | -1.8±0.07                                                   | 1.5                                                 |
| <b><math>\alpha</math>Y190F</b> | ACh                              | 0.02 <sup>b</sup> ±0.002               | 4.1E-7±7.E-8                             | -3.2±0.06                                                   | 2.0                                                 |
|                                 | TMA                              | 1.4E-3±2.E-4                           | 4.1E-7±7.E-8                             | -2.4±0.07                                                   | 2.1                                                 |
|                                 | Cho                              | 4.5E-5±6.E-6                           | 4.1E-7±7.E-8                             | -1.4±0.06                                                   | 1.9                                                 |
|                                 | 4OHB                             | 1.5E-4±7.E-6                           | 4.1E-7±7.E-8                             | -1.7±0.05                                                   | 2.3                                                 |
|                                 | PTMA                             | 2.0E-4±6.E-6                           | 4.1E-7±7.E-8                             | -1.8±0.05                                                   | 2.0                                                 |
| <b><math>\alpha</math>Y190A</b> | 3OHP                             | 8.1E-5±2.E-5                           | 4.1E-7±7.E-8                             | -1.6±0.07                                                   | 2.1                                                 |
|                                 | ACh                              | 5.3E-5 <sup>b</sup> ±3.E-6             | 6.3E-7±6.E-8                             | -1.3±0.03                                                   | 3.8                                                 |
|                                 | TMA                              | 1.7E-5±9.E-7                           | 6.3E-7±6.E-8                             | -1.0±0.03                                                   | 3.5                                                 |
|                                 | Cho                              | 7.3E-6±8.E-7                           | 6.3E-7±6.E-8                             | -0.7±0.04                                                   | 2.6                                                 |
| <b><math>\alpha</math>Y198F</b> | ACh                              | 14.02 <sup>b</sup> ±6.20               | 6.1E-7±9.E-8                             | -5.0±0.12                                                   | 0.1                                                 |
|                                 | TMA                              | 0.71±0.19                              | 6.1E-7±9.E-8                             | -4.1±0.08                                                   | 0.3                                                 |
|                                 | Cho                              | 0.013±0.003                            | 6.1E-7±9.E-8                             | -2.9±0.08                                                   | 0.3                                                 |
|                                 | 4OHB                             | 0.122±0.015                            | 6.1E-7±9.E-8                             | -3.6±0.05                                                   | 0.5                                                 |
| <b><math>\alpha</math>Y198A</b> | 3OHP                             | 0.043±0.003                            | 6.1E-7±9.E-8                             | -3.3±0.05                                                   | 0.3                                                 |
|                                 | ACh                              | 0.027 <sup>b</sup> ±0.009              | 8.3E-7±1.E-7                             | -3.0±0.11                                                   | 2.1                                                 |
|                                 | TMA                              | 0.003±3.E-4                            | 8.3E-7±1.E-7                             | -2.4±0.04                                                   | 2.1                                                 |
| <b><math>\alpha</math>K145A</b> | Cho                              | 5.0E-4±1.E-4                           | 8.3E-7±1.E-7                             | -1.9±0.10                                                   | 1.4                                                 |
|                                 | ACh                              | 0.55±0.18                              | 4.0E-7±8.E-8                             | -4.2±0.10                                                   | 1.0                                                 |
|                                 | TMA                              | 0.02±0.001                             | 4.0E-7±8.E-8                             | -3.2±0.06                                                   | 1.3                                                 |
| <b><math>\alpha</math>K145Q</b> | Cho                              | 4.7E-4±8.E-5                           | 4.0E-7±8.E-8                             | -2.1±0.07                                                   | 1.2                                                 |
|                                 | Cho                              | 0.002±2.E-4                            | 1.3E-6±5.E-7                             | -2.2±0.11                                                   | 1.1                                                 |
|                                 | <b><math>\alpha</math>K145A+</b> | ACh                                    | 0.08±0.02                                | 1.5E-6±2.E-8                                                | -3.2±0.07                                           |
| <b>Y190F</b>                    | TMA                              | 0.002±5.E-4                            | 1.5E-6±2.E-8                             | -2.2±0.05                                                   | 2.2                                                 |
|                                 | Cho                              | 6.5E-5±2.E-5                           | 1.5E-6±2.E-8                             | -1.1±0.07                                                   | 2.1                                                 |

$G_B$  is the binding energy,  $G_B = -0.59 \ln \sqrt{E_2/E_0}$ .  $\alpha$ W149,  $\alpha$ Y190, and  $\alpha$ Y198 in the AChR mouse  $\alpha$  subunit correspond to TrpB, TyrC1, and TyrC2 in AChBP.

<sup>a</sup>  $E_0$  measurements of the aromatic residue mutants were previously published (Purohit & Auerbach, 2010), corrected here for a  $E_0^{\text{wt}}$  value of  $7.4 \times 10^{-7}$  (Nayak *et al.*, 2012).

<sup>b</sup> Previously published  $E_2$  measurements (Jadey *et al.*, 2011; Purohit *et al.*, 2012)

<sup>c</sup> 3OHP, 3-hydroxypropyltrimethylammonium; PMTA, propyltrimethylammonium; 4OHB, 4-hydroxybutyltrimethylammonium. Previously published  $E_2$  measurements (Bruhova *et al.*, 2013).

**Table S2: Observed and corrected rate/equilibrium constants**

| <b>Mutant</b> | <b>Agonist</b> | <b>f<sub>2</sub></b> | <b>b<sub>2</sub></b> | <b>E<sub>2</sub><sup>obs</sup></b> | <b>bkgd</b>            | <b>E<sub>2</sub><sup>corr</sup></b> | <b>n</b> |
|---------------|----------------|----------------------|----------------------|------------------------------------|------------------------|-------------------------------------|----------|
| <b>αW149F</b> | TMA            | 1215±107             | 1190±204             | 1.02±0.09                          | 1.35 <sup>ab</sup>     | 0.755±0.063                         | 3        |
|               | Cho            | 769±104              | 1214±67              | 0.63±0.05                          | 14.2 <sup>ac</sup>     | 0.045±0.004                         | 3        |
| <b>αW149A</b> | TMA            | 154±25               | 2850±208             | 0.05±0.01                          | 14.2 <sup>ac</sup>     | 0.004±0.001                         | 4        |
|               | Cho            | 799±36               | 2490±506             | 0.32±0.08                          | 120 <sup>acd</sup>     | 0.003±0.001                         | 3        |
| <b>αY190F</b> | TMA            | 554±55               | 3325±587             | 0.17±0.03                          | 120 <sup>acd</sup>     | 1.4E-3±2.E-4                        | 3        |
|               | PTMA           | 1451±51              | 3576±22              | 0.41±0.01                          | 2085 <sup>acde</sup>   | 2.0E-4±6.E-6                        | 3        |
|               | 4OHB           | 1390±276             | 4550±723             | 0.31±0.01                          | 2085 <sup>acde</sup>   | 1.5E-4±7.E-6                        | 3        |
|               | 3OHP           | 878±143              | 5228±729             | 0.17±0.03                          | 2085 <sup>acde</sup>   | 8.1E-5±2.E-5                        | 4        |
|               | Cho            | 468±47               | 5070±195             | 0.09±0.01                          | 2085 <sup>acde</sup>   | 4.5E-5±6.E-6                        | 4        |
| <b>αY190A</b> | TMA            | 639±38               | 2762±84              | 0.23±0.01                          | 1.3E+4 <sup>abf</sup>  | 1.7E-5±9.E-7                        | 3        |
|               | Cho            | 462±19               | 4572±556             | 0.10±0.01                          | 1.3E+4 <sup>abf</sup>  | 7.3E-6±9.E-7                        | 4        |
| <b>αY198F</b> | TMA            | 762±177              | 1347±269             | 0.57±0.15                          | 0.8 <sup>ag</sup>      | 0.709±0.188                         | 4        |
|               | 4OHB           | 474±15               | 2882±677             | 0.16±0.02                          | 1.35 <sup>ab</sup>     | 0.122±0.015                         | 3        |
|               | 3OHP           | 1169±210             | 1918±307             | 0.61±0.04                          | 14.2 <sup>ac</sup>     | 0.043±0.003                         | 2        |
|               | Cho            | 317±72               | 1784±290             | 0.18±0.04                          | 14.2 <sup>ac</sup>     | 0.013±0.003                         | 8        |
| <b>αY198A</b> | TMA            | 761±164              | 2207±63              | 0.34±0.03                          | 120 <sup>acd</sup>     | 0.003±3.E-4                         | 4        |
|               | Cho            | 259±89               | 4343±336             | 0.06±0.02                          | 120 <sup>acd</sup>     | 5.0E-4±1.E-4                        | 4        |
| <b>αK145A</b> | ACh            | 320±142              | 7231±805             | 0.04±0.01                          | 0.08 <sup>a</sup>      | 0.55±0.18                           | 4        |
|               | TMA            | 412±5                | 1533±321             | 0.27±0.04                          | 14.2 <sup>ac</sup>     | 0.02±0.001                          | 3        |
|               | Cho            | 318±33               | 5661±368             | 0.06±0.01                          | 120 <sup>acd</sup>     | 4.7E-4±8.E-5                        | 3        |
|               | None*          | 879±198              | 10446±1332           | 0.08±0.02                          | 2.1E+5 <sup>acdh</sup> | 4.0E-7±8.E-8                        | 3        |
| <b>αK145Q</b> | Cho            | 132±4                | 4795±643             | 0.03±0.002                         | 14.2 <sup>ac</sup>     | 0.002±2.E-4                         | 3        |
|               | None*          | 1395±395             | 6066±939             | 0.26±0.08                          | 2.1E+5 <sup>acdh</sup> | 1.3E-6±5.E-7                        | 3        |
| <b>αK145A</b> | ACh            | 2020±252             | 1748±346             | 1.16±0.28                          | 14.2 <sup>ac</sup>     | 0.08±0.02                           | 4        |
| <b>+Y190F</b> | TMA            | 389±14               | 654±228              | 0.60±0.11                          | 241 <sup>abc</sup>     | 0.002±5.E-4                         | 3        |
|               | Cho            | 70±22                | 9046±1308            | 0.01±0.002                         | 120 <sup>acd</sup>     | 6.5E-5±2.E-5                        | 3        |
|               | None*          | 1246±80              | 4067±320             | 0.31±0.004                         | 2.1E+5 <sup>acdh</sup> | 1.5E-6±2.E-8                        | 3        |

f<sub>2</sub>, diliganded opening rate constant (s<sup>-1</sup>); b<sub>2</sub>, diliganded closing rate constant (s<sup>-1</sup>); E<sub>2</sub><sup>obs</sup>, measured diliganded gating equilibrium constant (=f<sub>2</sub>/b<sub>2</sub>); bkgd, the net fold-change in E<sub>0</sub> of the background; E<sub>2</sub><sup>corr</sup>, diliganded gating equilibrium constant corrected to the reference condition (-100 mV, wt; = E<sub>2</sub><sup>obs</sup>/bkgd); n, number of patches.

Background perturbations: <sup>a</sup> V<sub>m</sub>=+100 mV; <sup>b</sup> εS450A, <sup>c</sup> εL269F, <sup>d</sup> εE181W, <sup>e</sup> δV269L, <sup>f</sup> α(D97A+Y127F), <sup>g</sup> εS450W, <sup>h</sup> δV269A (for individual fold-changes in E<sub>0</sub> see Table S3).

\*None represents unlabeled gating E<sub>0</sub>=f<sub>0</sub>/b<sub>0</sub>, specifically for αK145A and Q mutants.

**Table S3: Effects of mutations on  $E_0$ .**

| <b>Perturbation</b>                | <b>Location</b> | <b><math>E_0^{mt}/E_0^{wt, -0.1V}</math></b> | <b>Reference</b>                  |
|------------------------------------|-----------------|----------------------------------------------|-----------------------------------|
| $\alpha$ D97A                      | Loop A          | 168.5                                        | (Chakrapani <i>et al.</i> , 2003) |
| $\alpha$ Y127F                     | ECD             | 59                                           | (Purohit <i>et al.</i> , 2007)    |
| $\beta$ L262A                      | M2              | 372                                          | (Purohit <i>et al.</i> , 2013)    |
| $\beta$ L262M                      | M2              | 68.2                                         | (Purohit <i>et al.</i> , 2013)    |
| $\delta$ W57A                      | ECD             | 0.5                                          | (Bafna <i>et al.</i> , 2009)      |
| $\delta$ W57R                      | ECD             | 0.7                                          | (Bafna <i>et al.</i> , 2009)      |
| $\delta$ V269L                     | M2              | 14                                           | (Cymes <i>et al.</i> , 2002)      |
| $\delta$ P123R                     | ECD             | 0.22                                         | (Gupta <i>et al.</i> , 2013)      |
| $\epsilon$ P121R                   | ECD             | 0.09                                         | (Gupta <i>et al.</i> , 2013)      |
| $\epsilon$ E181T                   | Loop 9          | 2.2                                          | (Jha <i>et al.</i> , 2012)        |
| $\epsilon$ E181W+ $\epsilon$ L269F | Loop 9          | 1492                                         | (Jha <i>et al.</i> , 2012)        |
| $\epsilon$ L269F                   | M2              | 179                                          | (Jha <i>et al.</i> , 2009)        |
| $\epsilon$ S450A                   | M4              | 17                                           | (Mitra <i>et al.</i> , 2004)      |
| $\epsilon$ S450W                   | M4              | 9.9                                          | (Mitra <i>et al.</i> , 2004)      |
| +100mV                             | TMD             | 0.08                                         | (Nayak <i>et al.</i> , 2012)      |

ECD: Extracellular domain, TMD, transmembrane domain; M2, M4: transmembrane segments 2 and 4.

**Table S4: Single site AChRs with transmitter binding site mutations**

| Mutant site                        | Agonist | $E_0^{\text{bkgd}, -0.1V}$ | $E_1^{\text{bkgd}, -0.1V}$ | $G_{B1}$ ,<br>kcal/mol | $\Delta G_{B1}$ ,<br>kcal/mol |
|------------------------------------|---------|----------------------------|----------------------------|------------------------|-------------------------------|
| Wt $\alpha\delta$                  | Cho     |                            |                            | -3.5                   |                               |
|                                    | Cho     |                            |                            | -2.7                   |                               |
| Wt $\alpha\varepsilon$             | TMA     |                            |                            | -4.2                   |                               |
|                                    | TMA     |                            |                            | -3.8                   |                               |
| $\alpha$ W149A $\alpha\delta$      | Cho     | 0.02 <sup>a</sup>          | 0.69                       | -2.1                   | 1.4                           |
|                                    | TMA     | 0.02 <sup>a</sup>          | 0.47                       | -1.8                   | 2.4                           |
| $\alpha$ W149A $\alpha\varepsilon$ | Cho     | 0.09 <sup>b</sup>          | 0.78                       | -1.3                   | 1.4                           |
|                                    | TMA     | 0.09 <sup>b</sup>          | 0.86                       | -1.3                   | 2.5                           |
| $\alpha$ Y198A $\alpha\delta$      | Cho     | 0.03 <sup>c</sup>          | 1.88                       | -2.2                   | 1.3                           |
|                                    | TMA     | 0.01 <sup>a</sup>          | 0.25                       | -2.3                   | 1.9                           |
| $\alpha$ Y198A $\alpha\varepsilon$ | Cho     | 0.34 <sup>d</sup>          | 2.68                       | -1.2                   | 1.5                           |

WT Cho and TMA  $G_{B1}$  were previously published (Nayak *et al.*, 2014).

Along with the transmitter binding site mutant ( $\alpha$ W149A or  $\alpha$ Y198A), the  $E_0$  and  $E_1$  were measured on a mutant construct containing the following background mutations:

<sup>a</sup> $\varepsilon$ P121R+ $\varepsilon$ L269F+ $\varepsilon$ E181T+ $\beta$ L262M; <sup>b</sup>  $\delta$ P123R+ $\delta$ W57R+ $\varepsilon$ L269F+ $\varepsilon$ E181W+ $\beta$ L262M;

<sup>c</sup> $\varepsilon$ P121R+ $\varepsilon$ L269F+ $\varepsilon$ E181W+ $\beta$ L262A; <sup>d</sup>  $\delta$ P123R+ $\delta$ W57A+ $\varepsilon$ L269F+ $\varepsilon$ E181W+ $\beta$ L262A.

## REFERENCES

- Bafna PA, Jha A & Auerbach A. (2009). Aromatic Residues {epsilon}Trp-55 and {delta}Trp-57 and the Activation of Acetylcholine Receptor Channels. *J Biol Chem* **284**, 8582-8588.
- Bruhova I, Gregg T & Auerbach A. (2013). Energy for wild-type acetylcholine receptor channel gating from different choline derivatives. *Biophys J* **104**, 565-574.
- Chakrapani S, Bailey TD & Auerbach A. (2003). The role of loop 5 in acetylcholine receptor channel gating. *J Gen Physiol* **122**, 521-539.
- Cymes GD, Grosman C & Auerbach A. (2002). Structure of the transition state of gating in the acetylcholine receptor channel pore: a phi-value analysis. *Biochemistry* **41**, 5548-5555.
- Gupta S, Purohit P & Auerbach A. (2013). Function of interfacial prolines at the transmitter-binding sites of the neuromuscular acetylcholine receptor. *J Biol Chem* **288**, 12667-12679.
- Jadey SV, Purohit P, Bruhova I, Gregg TM & Auerbach A. (2011). Design and control of acetylcholine receptor conformational change. *Proc Natl Acad Sci U S A* **108**, 4328-4333.
- Jha A, Gupta S, Zucker SN & Auerbach A. (2012). The energetic consequences of loop 9 gating motions in acetylcholine receptor-channels. *J Physiol* **590**, 119-129.
- Jha A, Purohit P & Auerbach A. (2009). Energy and structure of the M2 helix in acetylcholine receptor-channel gating. *Biophys J* **96**, 4075-4084.
- Mitra A, Bailey TD & Auerbach AL. (2004). Structural dynamics of the M4 transmembrane segment during acetylcholine receptor gating. *Structure* **12**, 1909-1918.
- Nayak TK, Bruhova I, Chakraborty S, Gupta S, Zheng W & Auerbach A. (2014). Functional differences between neurotransmitter binding sites of muscle acetylcholine receptors. *Proc Natl Acad Sci U S A* **111**, 17660-17665.
- Nayak TK, Purohit PG & Auerbach A. (2012). The intrinsic energy of the gating isomerization of a neuromuscular acetylcholine receptor channel. *J Gen Physiol* **139**, 349-358.
- Purohit P & Auerbach A. (2010). Energetics of gating at the apo-acetylcholine receptor transmitter binding site. *J Gen Physiol* **135**, 321-331.

Purohit P, Bruhova I & Auerbach A. (2012). Sources of energy for gating by neurotransmitters in acetylcholine receptor channels. *Proc Natl Acad Sci U S A* **109**, 9384-9389.

Purohit P, Gupta S, Jadey S & Auerbach A. (2013). Functional anatomy of an allosteric protein. *Nat Commun* **4**, 2984.

Purohit P, Mitra A & Auerbach A. (2007). A stepwise mechanism for acetylcholine receptor channel gating. *Nature* **446**, 930-933.
